# Supplementary material for: Excellent energy storage performance in cross-linked polyimide dielectrics with positively charged cross-linking points
Source: Royal Society of Chemistry journal article supplement (doi:10.1039/d5tc02276b), 2025-01-01
Supplement: d5tc02276b1.pdf [file d5tc02276b1.pdf]

## **Supplementary material**

### **Excellent energy storage performance in cross-linked polyimide dielectric with positively charged cross-linking points**

Yu Feng <sup>a, b</sup>, Tianlong Liu <sup>a, b</sup>, Jun Sun <sup>a, b</sup>, Dongyu Hou <sup>a, b</sup>, Yanqing Wang <sup>a, b</sup>,  
Dong Yue <sup>\*a, b</sup>

<sup>a</sup>Key Laboratory of Engineering Dielectrics and Its Application, Ministry of Education,  
Harbin University of Science and Technology, Harbin, Heilongjiang 150080, P. R.  
China

<sup>b</sup> School of Electrical and Electronic Engineering, Harbin University of Science and  
Technology, Harbin, Heilongjiang 150080, P. R. China

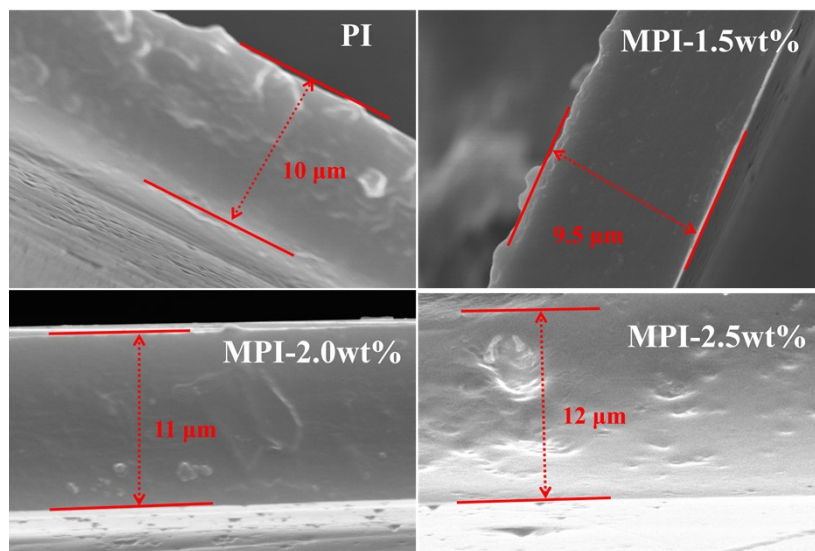

**Fig. S1** SEM images of PI, MPI-1.5wt%, MPI-2.0wt%, MPI-2.5wt%.

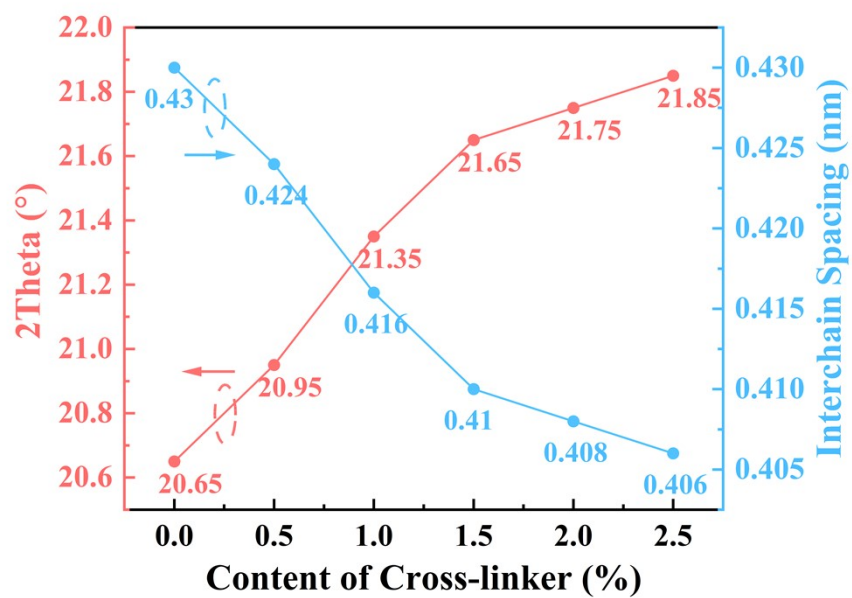

**Fig. S2** Change in interchain spacing of MPI with cross-linker content.

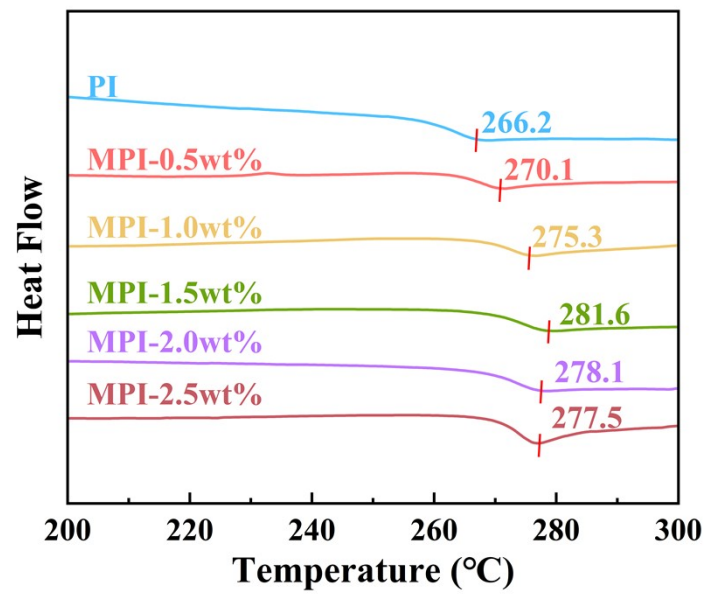

Fig. S3 DSC curves of PI and MPI.

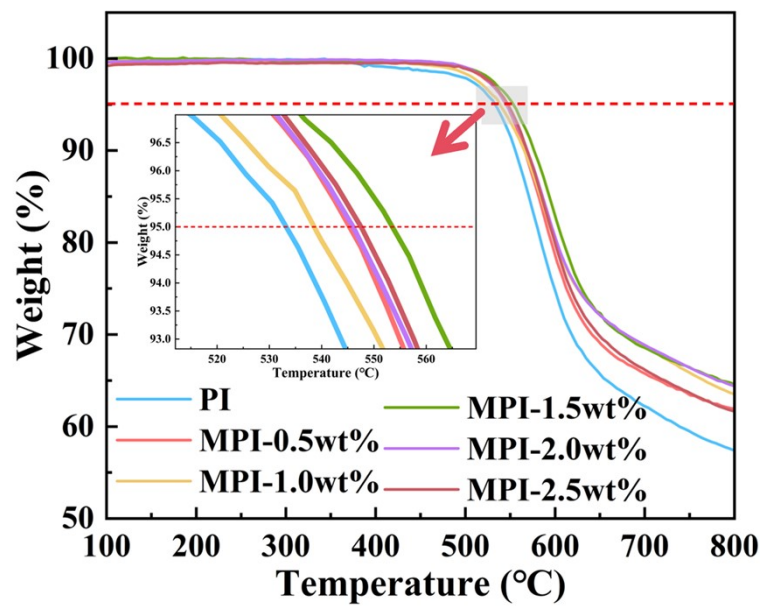

Fig. S4 TGA curves of PI and MPI.

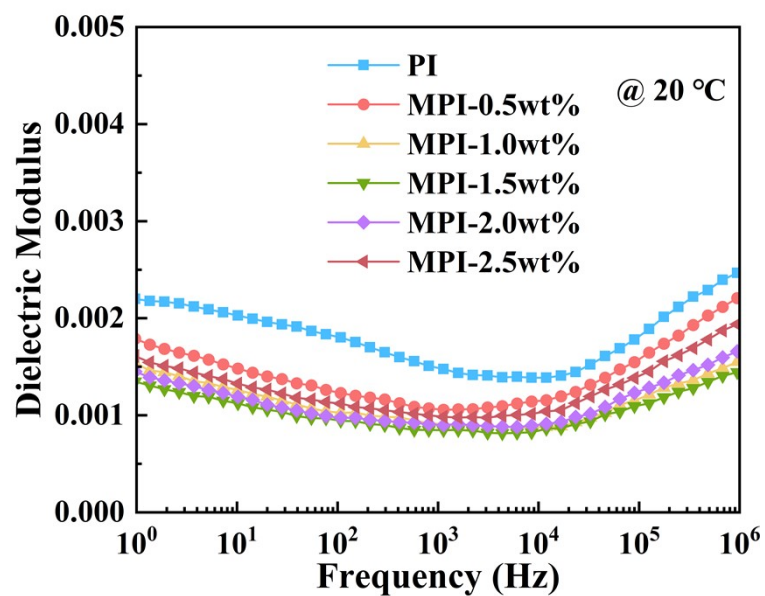

**Fig. S5** Variation of the imaginary part of the dielectric modulus with frequency for PI and MPI.

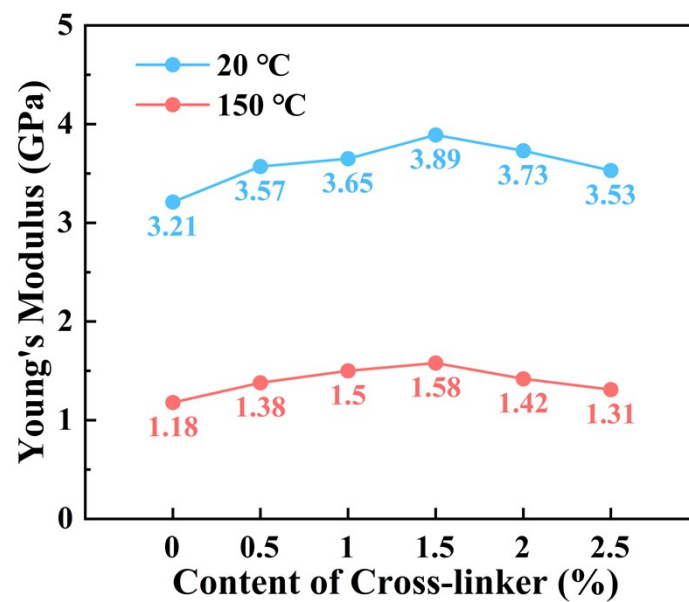

**Fig. S6** Variation of Young's modulus of MPI with cross-linker content at different temperatures.

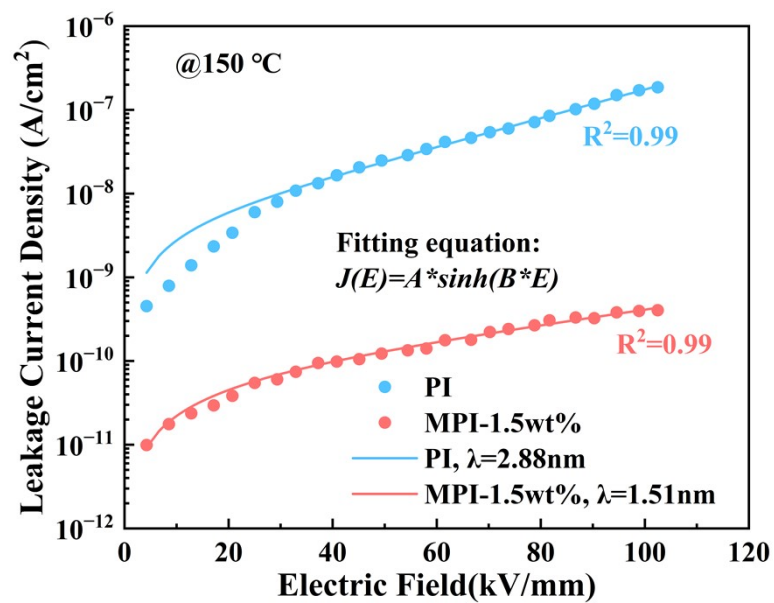

Fig. S7 Leakage current density fitting for PI and MPI at 150 °C.



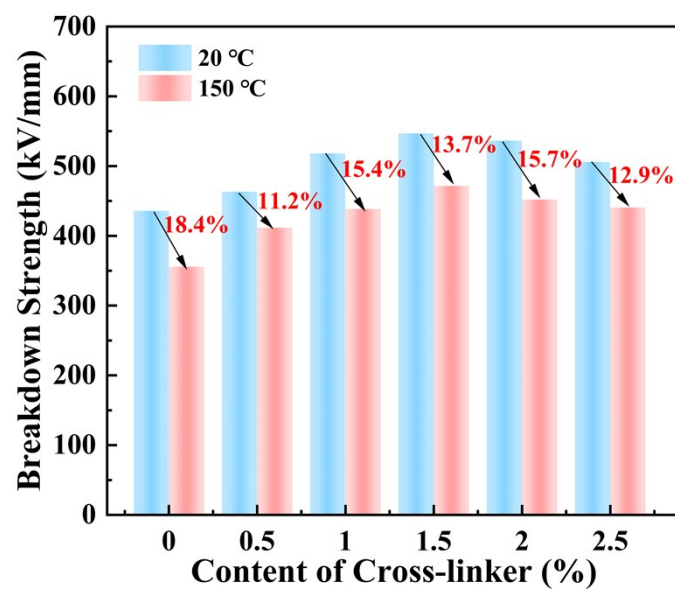

**Fig. S8** Comparison of breakdown strength of MPI at different temperatures.

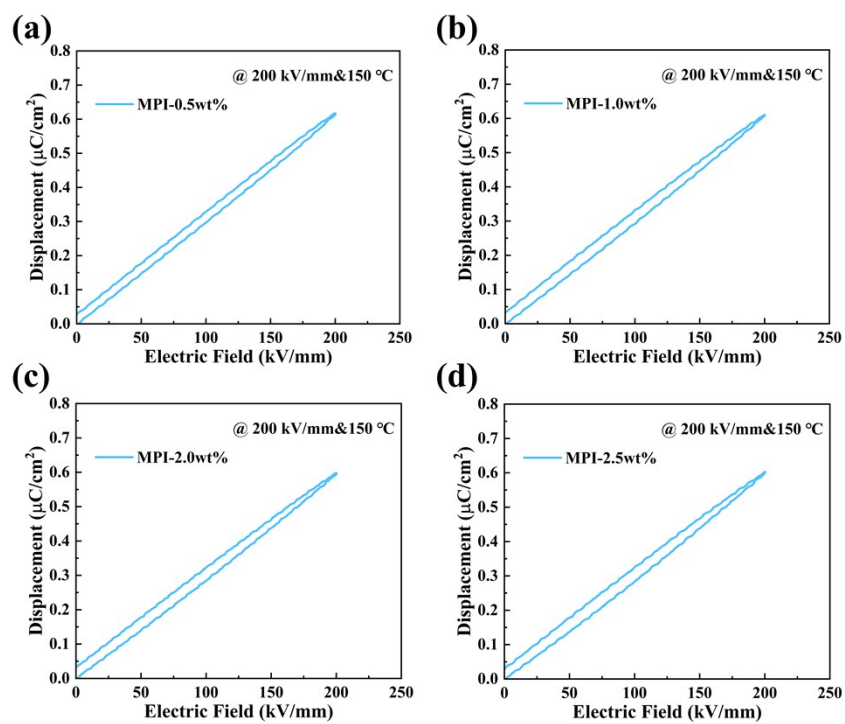

**Fig. S9** *D-E* curves of MPI at  $150^\circ\text{C}$  and  $200\text{ kV}/\text{mm}$ .
